# Supplementary material for: miRNome traits analysis on endothelial lineage cells discloses biomarker potential circulating microRNAs which affect progenitor activities
Source: PubMed Central journal article supplement (PMC4176563; doi:10.1186/1471-2164-15-802), 2014-09-18
Supplement: 12864_2014_6478_MOESM6_ESM.pdf [file 12864_2014_6478_MOESM6_ESM.pdf]

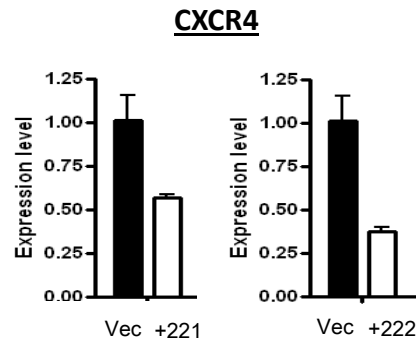

**Supplementary Figure 1.** RT-qPCR validation showing the repression of CXCR4

levels in late EPCs overexpressing with miR-221 or miR-222 (n=3).
